# Supplementary material for: Pseudomonas aeruginosa Community-Onset Bloodstream Infections: Characterization, Diagnostic Predictors, and Predictive Score Development—Results from the PRO-BAC Cohort
Source: Antibiotics (Basel). 2022 May 24;11(6):707. doi: 10.3390/antibiotics11060707 (PMC9220177; doi:10.3390/antibiotics11060707)
Supplement: Supplementary file 1 [file antibiotics-11-00707-s001.zip › antibiotics-1714725-supplementary.pdf]

## Article

# *Pseudomonas aeruginosa* Community-Onset Bloodstream Infections: Characterization, Diagnostic Predictors, and Predictive Score Development—Results from the PRO-BAC Cohort

Pedro María Martínez Pérez-Crespo <sup>1,2</sup>, Álvaro Rojas <sup>3</sup>, Joaquín Felipe Lanz-García <sup>1</sup>, Pilar Retamar-Gentil<sup>1</sup>, José María Reguera-Iglesias <sup>4</sup>, Olalla Lima-Rodríguez <sup>5</sup>, Alfonso del Arco Jiménez <sup>6</sup>, Jonathan Fernández Suárez <sup>7</sup>, Alfredo Jover-Saenz<sup>8</sup>, Josune Goikoetxea Aguirre <sup>9</sup>, Eva León Jiménez <sup>2</sup>, María Luisa Cantón-Bulnes<sup>10</sup>, Pilar Ortega Lafont<sup>11</sup>, Carlos Armiñanzas Castillo <sup>12</sup>, Juan Sevilla Blanco <sup>13</sup>, Jordi Cuquet Pedragosa<sup>14</sup>, Lucía Boix-Palop<sup>15</sup>, Berta Becerril Carral<sup>16</sup>, Alberto Bahamonde-Carrasco <sup>17</sup>, Teresa Marrodan Ciordia<sup>18</sup>, Clara Natera Kindelán<sup>19</sup>, Isabel María Reche Molina <sup>20</sup>, Carmen Herrero Rodríguez <sup>21</sup>, Inés Pérez Camacho <sup>22</sup>, David Vinuesa García <sup>23</sup>, Fátima Galán-Sánchez <sup>24</sup>, Alejandro Smithson Amat<sup>25</sup>, Esperanza Merino de Lucas <sup>26</sup>, Antonio Sánchez-Porto <sup>27</sup>, Marcos Guzmán García <sup>28</sup>, Inmaculada López-Hernández <sup>1</sup>, Jesús Rodríguez-Baño <sup>1,\*</sup>, Luis Eduardo López-Cortés <sup>1</sup> and on behalf of the PROBAC REIPI/GEIH-SEIMC/SAEI Group .

Table S1. Strobe checklist.

| Selection/Topic        | #  | Checklist Item                                                                                                                           | Reported on Page # |
|------------------------|----|------------------------------------------------------------------------------------------------------------------------------------------|--------------------|
| TITLE AND ABSTRACT     |    |                                                                                                                                          |                    |
| Title and abstract     | 1  | (a) Indicate study’s design with a commonly used term in title or abstract                                                               | 1                  |
|                        |    | (b) Provide in the abstract an informative and balance summary of what was done and found                                                | 1,2                |
| INTRODUCTION           |    |                                                                                                                                          |                    |
| Background/Rationale   | 2  | Explain the scientific background and rationale for the investigation being reported                                                     | 2                  |
| Objectives             | 3  | State specific objectives, including any prespecified hypotheses                                                                         | 2                  |
| METHODS                |    |                                                                                                                                          |                    |
| Study design           | 4  | Present key elements of study design early in the paper                                                                                  | 2,3                |
| Setting                | 5  | Describe setting, locations, and relevant dates, including periods of recruitment, exposure, follow-up, and data collection              | 2,3                |
| Participants           | 6  | (a) Cohort study- Give eligibility criteria, and the sources and methods of selection participants. Describe methods of follow-up.       | 2,3                |
|                        |    | (b) Cohort study- For matched studies, give matching criteria and number of exposed and unexposed                                        |                    |
| Study selection        | 7  | Clearly define all outcomes, exposures, predictors, potential confounders, and effect modifiers. Give diagnostic criteria, if applicable | 2,3                |
| Data sources           | 8  | For each study, present characteristics for which data were extracted (e.g., study size, etc)                                            | 2,3                |
| Bias                   | 9  | Describe any efforts to address potential sources of bias                                                                                | 2, 3               |
| Study size             | 10 | Explain how the study size was arrived at                                                                                                | 2, 3               |
| Quantitative variables | 11 | Explain how quantitative variables were handled in the analysis. If applicable, describe which groupings were chosen and why             | 3                  |
| Statistical methods    | 12 | (a) Describe all statistical methods, including those used to control for confounding                                                    | 3                  |
|                        |    | (b) Describe any methods used to examine subgroups and interactions                                                                      | 3                  |
|                        |    | (c) Explain how missing data were addressed                                                                                              |                    |
|                        |    | (d) Cohort study- If applicable, explain how loss to follow-up was addressed.                                                            |                    |
|                        |    | (e) Describe any sensitivity analyses                                                                                                    | 3                  |
| RESULTS                |    |                                                                                                                                          |                    |

|                   |    |                                                                                                                                                                                                                                                                                                                                                                                                           |                    |
|-------------------|----|-----------------------------------------------------------------------------------------------------------------------------------------------------------------------------------------------------------------------------------------------------------------------------------------------------------------------------------------------------------------------------------------------------------|--------------------|
| Participants      | 13 | (a) Report numbers of individuals at each stage of the study- e.g. numbers potentially eligible, examined for eligibility, confirmed eligible, included in the study, completing follow-up, and analysed<br>(b) Give reasons for non-participation at each stage<br>(c) Consider use a flow diagram                                                                                                       | 4<br>4             |
| Descriptive data  | 14 | (a) Give characteristics of study participants (eg demographic, clinical, social) and information on exposures and potential confounders<br>(b) Indicate number of participants with missing data for each variable of interest<br>(c) Cohort study- Summarize follow-up time (eg average and total amount)                                                                                               | 4<br>4,5,6         |
| Outcome data      | 15 | Cohort study- Report numbers of outcome events or summary measures over time                                                                                                                                                                                                                                                                                                                              | 4,5,6,7            |
| Main results      | 16 | (a) Give unadjusted estimates, and if applicable, confounder-adjusted estimates and their precision (eg, 95% confidence interval). Make clear which confounders were adjusted for and why they were included.<br>(b) Report category boundaries when continuous variables were categorized<br>(c) If relevant, consider translating estimates of relative risk into absolute risk for a meaningful period | 4,5,6,7<br>4,5,6,7 |
| Other analysis    | 17 | Report other analyses done- eg analyses of subgroups and interactions, and sensitivity analyses                                                                                                                                                                                                                                                                                                           | 6,7                |
| DISCUSSION        |    |                                                                                                                                                                                                                                                                                                                                                                                                           |                    |
| Key results       | 18 | summaries key results with reference to study objectives                                                                                                                                                                                                                                                                                                                                                  | 7,8                |
| Limitations       | 19 | Discuss limitations of the study, taking into account sources of potential bias or imprecision. Discuss both directions and magnitude of any potential bias.                                                                                                                                                                                                                                              | 8                  |
| Interpretation    | 20 | Give a cautious overall interpretation of results considering objectives, limitations, multiplicity of analyses, results from similar studies, and other relevant evidence                                                                                                                                                                                                                                | 7, 8               |
| Generalisability  | 21 | Discuss generalizability (external validity) of the study results                                                                                                                                                                                                                                                                                                                                         | 8                  |
| OTHER INFORMATION |    |                                                                                                                                                                                                                                                                                                                                                                                                           |                    |
| Funding           | 22 | Give the source of funding and the role of the funders for the present study and, if applicable, for the original study on which the present article is based                                                                                                                                                                                                                                             | 9                  |

**Table S2.** Antimicrobial exposure in the previous month. Data are number (%) of cases.

|                                               | <i>Enterobacteriales</i> (n = 2572) | <i>P. aeruginosa</i> (n = 78) | <i>p</i> |
|-----------------------------------------------|-------------------------------------|-------------------------------|----------|
| Any previous antimicrobials                   | 610/2572 (23.7)                     | 29/78 (37.2)                  | <0.01    |
| Antipseudomonal antibiotics <sup>a</sup>      | 239/2572 (9.3)                      | 15/78 (19.2)                  | <0.01    |
| Antipseudomonal $\beta$ -lactams <sup>b</sup> | 95/2572 (3.7)                       | 10/78 (12.8)                  | <0.01    |
| Amoxicillin or ampicillin                     | 26/2572 (1)                         | 1/78 (1.3)                    | 0.81     |
| Amoxicillin - clavulanic acid                 | 166/2572 (6.5)                      | 5/78 (6.4)                    | 0.99     |
| Piperacillin –tazobactam                      | 60/2572 (2.3)                       | 6/78 (7.7)                    | 0.03     |
| Cloxacillin                                   | 4/2572 (0.2)                        | 2/78 (2.6)                    | <0.01    |
| Cephalosporins <sup>c</sup>                   | 131/2572 (5.1)                      | 9/78 (11.5)                   | 0.01     |
| Cefazolin                                     | 19/2572 (0.7)                       | 1/78 (1.3)                    | 0.56     |
| Cefditoren                                    | 3/2572 (0.1)                        | 0/78                          | 0.76     |
| Cefixime                                      | 13/2572 (0.5)                       | 2/78 (2.6)                    | 0.02     |
| Cefotaxime/Ceftriaxone                        | 23/2572 (0.9)                       | 1/78 (1.3)                    | 0.72     |
| Cefuroxime                                    | 74/2572 (2.9)                       | 4/78 (5.1)                    | 0.25     |
| Antipseudomonal cephalosporins <sup>d</sup>   | 6/2572 (0.2)                        | 2/78 (2.6)                    | <0.01    |
| Cefepime                                      | 4/2572 (0.2)                        | 1/78 (1.3)                    | 0.02     |
| Ceftazidime                                   | 2/2572 (0.1)                        | 1/78 (1.3)                    | <0.01    |
| Carbapenems <sup>e</sup>                      | 42/2572 (1.6)                       | 4/78 (5.1)                    | 0.02     |
| Ertapenem                                     | 10/2572 (0.4)                       | 2/78 (2.6)                    | 0.05     |
| Meropenem/Imipenem                            | 33/2572 (1.3)                       | 2/78 (2.6)                    | 0.33     |
| Aminoglycosides <sup>f</sup>                  | 12/2572 (0.5)                       | 1/78 (1.3)                    | 0.31     |

|                                |                |            |       |
|--------------------------------|----------------|------------|-------|
| Amikacin                       | 5/2572 (0.2)   | 0/78       | 0.70  |
| Gentamycin                     | 6/2572 (0.2)   | 1/78 (1.3) | 0.08  |
| Tobramycin                     | 1/2572 (0.1)   | 0/78       | 0.86  |
| Quinolones <sup>g</sup>        | 174/2572 (6.8) | 3/78 (3.8) | 0.31  |
| Ciprofloxacin                  | 110/2572 (4.3) | 3/78 (3.8) | 0.85  |
| Levofloxacin                   | 47/2572 (1.8)  | 0/78       | 0.23  |
| Moxifloxacin                   | 9/2572 (0.3)   | 0/78       | 0.60  |
| Norfloxacin                    | 13/2572 (0.5)  | 0/78       | 0.53  |
| Trimethoprim- sulfamethoxazole | 29/2572 (1.1)  | 7/78 (9)   | <0.01 |
| Tigecycline                    | 0/2572         | 1/78 (1.3) | <0.01 |
| Fosfomycin                     | 92/2572 (3.6)  | 1/78 (1.3) | 0.28  |
| Colistin                       | 1/2572 (0.1)   | 1/78 (1.3) | <0.01 |
| Clindamycin                    | 6/2572 (0.2)   | 0/78       | 0.70  |
| Metronidazole                  | 9/2572 (0.3)   | 0/78       | 0.60  |
| Azithromycin                   | 12/2572 (0.5)  | 0/78       | 0.55  |
| Daptomycin                     | 3/2572 (0.1)   | 0/78       | 0.70  |
| Linezolid                      | 4/2572 (0.2)   | 1/78 (1.3) | 0.02  |
| Vancomycin                     | 3/2572 (0.1)   | 2/78 (2.6) | <0.01 |

<sup>a</sup>Includes piperacillin-tazobactam, aztreonam, cefepime, ceftazidime, meropenem/imipenem, ciprofloxacin, levofloxacin, colistin, amikacin, gentamycin, tobramycin and tigecycline. <sup>b</sup>Includes piperacillin-tazobactam, aztreonam, cefepime, ceftazidime and meropenem/imipenem. <sup>c</sup>Includes cefazolin, cefditoren, cefepime, cefixime, cefotaxime/ceftriaxone, ceftazidime, cefuroxime. <sup>d</sup>Includes cefepime and ceftazidime. <sup>e</sup>Includes meropenem/imipenem and ertapenem. <sup>f</sup>Includes amikacin, gentamycin and tobramycin. <sup>g</sup>Includes ciprofloxacin, levofloxacin, moxifloxacin and norfloxacin.
